# Supplementary material for: Defining the essential function of FBP/KSRP proteins: Drosophila Psi interacts with the mediator complex to modulate MYC transcription and tissue growth
Source: PubMed Central journal article supplement — Nucleic Acids Res. 2016 May 20;44(16):7646–58. doi: 10.1093/nar/gkw461 (PMC5027480; doi:10.1093/nar/gkw461), 2016-05-20
Supplement: supp_gkw461_nar-00773-x-2016-File010.pdf [file supp_gkw461_nar-00773-x-2016-File010.pdf]

Table S2. Related to Figure 1 - area of compartment posterior of wing vein L5 in pixels

| Wing Area             | control | Psi RNAi 1 |
|-----------------------|---------|------------|
| Biological replicates | 30      | 72         |
| Mean                  | 76658   | 63374      |
| SD                    | 2140    | 4800       |
| SEM                   | 390.8   | 565.7      |

Table S3. Related to Figure 1 - wing hairs within fixed area of the central region of compartment posterior of wing vein L5 for Psi RNAi compared with control.

| Wing Cell Size        | control | Psi RNAi 1 |
|-----------------------|---------|------------|
| Biological replicates | 11      | 11         |
| Mean                  | 16.36   | 20.55      |
| SD                    | 0.67    | 1.57       |
| SEM                   | 0.2     | 0.47       |

Table S4. Related to Figure 3- area of compartment posterior of wing vein L5 in pixels for genotypes marked.

| Wing Area             | control | Psi RNAi 1 | CDK8 RNAi | Psi RNAi 1 +CDK8RNAi | CycC RNAi | CycC RNAi + Psi RNAi 1 |
|-----------------------|---------|------------|-----------|----------------------|-----------|------------------------|
| Biological replicates | 30      | 72         | 21        | 23                   | 21        | 26                     |
| Mean                  | 76658   | 63374      | 78065     | 73900                | 77935     | 78448                  |
| SD                    | 2140    | 4800       | 2075      | 2683                 | 2712      | 3064                   |
| SEM                   | 390.8   | 565.7      | 452.7     | 559.4                | 591.9     | 600.9                  |

Table S5. Related to Figure 3 - qPCR for CDK8 in Psi RNAi, CDK8 RNAi, Psi RNAi + CDK8 RNAi wing discs compared with control. Y axis on graph shows relative fold change.

| CDK8 qPCR             | control | Psi RNAi 1 | CDK8 RNAi | Psi RNAi 1 + CDK8 RNAi |
|-----------------------|---------|------------|-----------|------------------------|
| Biological replicates | 5       | 6          | 3         | 5                      |
| Mean                  | 1       | 0.938      | 0.2057    | 0.2771                 |
| SD                    | 0       | 0.1075     | 0.07323   | 0.1456                 |
| SEM                   | 0       | 0.04388    | 0.04228   | 0.06513                |

Table S6. Related to Figure 3- area of compartment posterior of wing vein L5 in pixels for genotypes marked.

| Wing Area             | control | Psi RNAi 1 | UAS MED4 | UAS MED4 + Psi RNAi 1 | UAS MED7 | UAS MED7 + Psi RNAi 1 |
|-----------------------|---------|------------|----------|-----------------------|----------|-----------------------|
| Biological replicates | 30      | 72         | 24       | 22                    | 24       | 23                    |
| Mean                  | 76658   | 63374      | 80281    | 70916                 | 73487    | 69362                 |
| SD                    | 2140    | 4800       | 2314     | 2201                  | 4193     | 3228                  |
| SEM                   | 390.8   | 565.7      | 472.4    | 469.3                 | 855.9    | 673.2                 |

| Wing Area             | UAS MED17 | UAS MED17 + Psi RNAi 1 | UAS MED19 | UAS MED19 + Psi RNA 1 | UAS MED20 | UAS MED20 + Psi RNAi 1 |
|-----------------------|-----------|------------------------|-----------|-----------------------|-----------|------------------------|
| Biological replicates | 20        | 17                     | 25        | 27                    | 20        | 27                     |
| Mean                  | 76087     | 70224                  | 72698     | 63936                 | 75017     | 67195                  |
| SD                    | 2913      | 2381                   | 3269      | 5371                  | 3058      | 2731                   |
| SEM                   | 651.5     | 577.4                  | 653.8     | 1034                  | 683.8     | 525.7                  |

| Wing Area             | UAS MED30 | UAS MED30 + Psi RNAi 1 | UAS MED31 | UAS MED31 + PsiRNAi 1 |
|-----------------------|-----------|------------------------|-----------|-----------------------|
| Biological replicates | 26        | 25                     | 22        | 26                    |
| Mean                  | 75769     | 69992                  | 82230     | 69485                 |
| SD                    | 2782      | 2870                   | 3537      | 3649                  |
| SEM                   | 545.6     | 574                    | 754.2     | 715.6                 |

Table S7. Related to Figure 4- area of compartment posterior of wing vein L5 in pixels for genotypes marked.

| Wing Area             | control | Psi RNAi 1 | UAS MYC | UAS MYC Psi RNAi 1 | MYC RNAi | MYC RNAi Psi RNAi 1 |
|-----------------------|---------|------------|---------|--------------------|----------|---------------------|
| Biological replicates | 30      | 72         | 20      | 25                 | 28       | 22                  |
| Mean                  | 76658   | 63374      | 75810   | 73568              | 67116    | 59080               |
| SD                    | 2140    | 4800       | 1685    | 4004               | 3456     | 5390                |
| SEM                   | 390.8   | 565.7      | 376.9   | 800.8              | 653.1    | 1149                |

Table S8. Related to Figure 4- qPCR for Psi in Psi RNAi wing discs compared with control.

| <b>Psi qPCR</b>       | W1118 | Psi RNAi 1 | Psi RNAi 2 | MYC RNAi |
|-----------------------|-------|------------|------------|----------|
| Biological replicates | 6     | 6          | 3          | 5        |
| Mean                  | 1     | 0.1435     | 0.2708     | 1.325    |
| SD                    | 0     | 0.01942    | 0.1101     | 0.1084   |
| SEM                   | 0     | 0.007928   | 0.06354    | 0.04847  |

Table S9. Related to Figure 4 - qPCR for dMYC in Psi RNAi and dMYC RNAi wing discs compared with control.

| <b>dMYC qPCR</b>      | W1118 | Psi RNAi 1 | Psi RNAi 2 | MYC RNAi |
|-----------------------|-------|------------|------------|----------|
| Biological replicates | 3     | 3          | 3          | 3        |
| Mean                  | 1     | 0.576      | 0.8078     | 0.4629   |
| SD                    | 0     | 0.05405    | 0.06424    | 0.09364  |
| SEM                   | 0     | 0.0312     | 0.03709    | 0.05406  |

Table S10. Related to Figure 5 - area of compartment posterior of wing vein L5 in pixels for genotypes marked.

| <b>Wing Area</b>      | control | MYC RNAi | CDK8 RNAi | MYC RNAi + CDK8 RNAi | CycC RNAi | MYCRNAi + CycC RNAi |
|-----------------------|---------|----------|-----------|----------------------|-----------|---------------------|
| Biological replicates | 30      | 28       | 84        | 67                   | 21        | 34                  |
| Mean                  | 76658   | 67116    | 78028     | 76274                | 77935     | 81062               |
| SD                    | 2140    | 3456     | 3052      | 2828                 | 2712      | 2776                |
| SEM                   | 390.8   | 653.1    | 333       | 345.5                | 591.9     | 476                 |

| <b>Wing Area</b>      | MED18 RNAi | MYC RNAi + MED18 RNAi | UAS MED 18 | MYC RNAi + UAS MED18 | UAS MED17 | MYC RNAi + UAS MED17 |
|-----------------------|------------|-----------------------|------------|----------------------|-----------|----------------------|
| Biological replicates | 37         | 32                    | 20         | 52                   | 20        | 28                   |
| Mean                  | 74947      | 66675                 | 81512      | 83336                | 76087     | 84236                |
| SD                    | 2790       | 3132                  | 3072       | 2280                 | 2913      | 2307                 |
| SEM                   | 458.6      | 553.7                 | 686.9      | 316.2                | 651.5     | 435.9                |

Table S11. Related to Figure 6 - luciferase assays

| <b>Luciferase Assays</b> | pLGB2 | Full Length | E1A  | VP16 | PSI 1-591 | PSI 1-610 | PSI 1-676 | PSI 1-705 | PSI 1-729 |
|--------------------------|-------|-------------|------|------|-----------|-----------|-----------|-----------|-----------|
| Biological replicates    | 2     | 2           | 1    | 1    | 2         | 2         | 2         | 2         | 2         |
| Mean                     | 1     | 2.95        | 1.42 | 3.31 | 0.71      | 0.8       | 2.335     | 1.315     | 1.225     |
| SD                       | 0     | 0.3536      | 0    | 0    | 0.7778    | 0.297     | 0.7       | 0.8415    | 0.6576    |
| SEM                      | 0     | 0.25        | 0    | 0    | 0.55      | 0.21      | 0.495     | 0.595     | 0.465     |

| <b>Luciferase Assays</b> | PSI 569-591 | PSI 569-610 | PSI 569-676 | PSI 569-705 | PSI 569-729 |
|--------------------------|-------------|-------------|-------------|-------------|-------------|
| Biological replicates    | 2           | 2           | 2           | 2           | 2           |
| Mean                     | 0.75        | 3.38        | 21.03       | 6.36        | 10.95       |
| SD                       | 0.495       | 0.2404      | 0.3253      | 2.051       | 5.247       |
| SEM                      | 0.35        | 0.17        | 0.23        | 1.45        | 3.71        |

Table S12. Related to Figure 7 - % enrichment ChIP

| <b>Ser5 Pol II ChIP</b> | wild type |      |   | Psi RNAi 1 |      |   | wild type mock IP |        |   | Psi RNAi 1 mock IP |        |   |
|-------------------------|-----------|------|---|------------|------|---|-------------------|--------|---|--------------------|--------|---|
| Primers                 | % Input   | SEM  | n | % Input    | SEM  | n | % Input           | SEM    | n | % Input            | SEM    | n |
| MYC 1                   | 1.1       | 0.26 | 4 | 0.64       | 0.13 | 4 | 0.086             | 0.0374 | 3 | 0.061              | 0.0204 | 4 |
| MYC 2                   | 4.8       | 0.5  | 4 | 2          | 0.3  | 4 | 0.066             | 0.0224 | 3 | 0.061              | 0.0264 | 4 |
| MYC 3                   | 2         | 0.50 | 4 | 1.3        | 0.26 | 4 | 0.068             | 0.0234 | 3 | 0.068              | 0.0314 | 4 |
| MYC 4                   | 1.7       | 0.34 | 4 | 1.3        | 0.34 | 4 | 0.068             | 0.0244 | 3 | 0.066              | 0.0384 | 4 |

| <b>Ser2 Pol II ChIP</b> | wild type |       |   | Psi RNAi 1 |      |   | wild type mock IP |       |   | Psi RNAi 1 mock IP |       |   |
|-------------------------|-----------|-------|---|------------|------|---|-------------------|-------|---|--------------------|-------|---|
| Primers                 | % Input   | SEM   | n | % Input    | SEM  | n | % Input           | SEM   | n | % Input            | SEM   | n |
| MYC 2                   | 1.00      | 0.00  | 3 | 0.60       | 0.15 | 3 | 0.05              | 0.019 | 3 | 0.03               | 0.006 | 3 |
| MYC 3                   | 0.82      | 0.021 | 3 | 0.51       | 0.09 | 3 | 0.07              | 0.025 | 3 | 0.04               | 0.009 | 3 |
| MYC 4                   | 0.76      | 0.059 | 3 | 0.46       | 0.07 | 3 | 0.06              | 0.02  | 3 | 0.04               | 0.007 | 3 |
| MYC 3'UTR               | 0.61      | 0.081 | 3 | 0.42       | 0.05 | 3 | 0.05              | 0.02  | 3 | 0.04               | 0.006 | 3 |
